# Supplementary material for: The association between tax structure and cigarette price variability: findings from the ITC Project
Source: HighWire-hosted journal article supplement (doi:10.1136/tobaccocontrol-2014-051771), 2015-04-08
Supplement: tobaccocontrol-2014-051771supp.pdf [file tobaccocontrol-2014-051771supp.pdf]

Appendix I

1, Duration of ITC waves (sources: ITC project website):

**Table: Duration of surveys, Countries, Date/Month/Year or Month/Year.**

**In case one wave of survey was carried out in two calendar years, the year when most respondents were (likely) surveyed is bolded.**

| Wave | Australia                       | Canada                                                                                     | US                            | UK                            | The Netherlands     | Malaysia                     | Thailand            | Mexico              | Uruguay                      | France                      | Germany             |
|------|---------------------------------|--------------------------------------------------------------------------------------------|-------------------------------|-------------------------------|---------------------|------------------------------|---------------------|---------------------|------------------------------|-----------------------------|---------------------|
| 1    | 10/2002-<br>12/2002             | 10/2002-<br>12/2002                                                                        | 10/2002-<br>12/2002           | 10/2002-<br>12/2002           | 03/2008-<br>04/2008 | 01/2005-<br>03/2005          | 01/2005-<br>03/2005 | 09/2006-<br>11/2006 | 11/2006-<br>12/2006          | 12/2006-<br>02/ <b>2007</b> | 07/2007-<br>11/2007 |
| 2    | 05/2003-<br>09/2003             | 05/2003-<br>09/2003                                                                        | 05/2003-<br>09/2003           | 05/2003-<br>09/2003           | 11/2008-<br>12/2008 | 07/ <b>2006</b> -<br>06/2007 | 08/2006-<br>09/2006 | 11/2007-<br>12/2007 | 10/ <b>2008</b> -<br>02/2009 | 09/2008-<br>11/2008         | 07/2009-<br>10/2009 |
| 3    | 06/2004-<br>12/2004             | 06/2004-<br>12/2004                                                                        | 06/2004-<br>12/2004           | 06/2004-<br>12/2004           | 03/2009-<br>05/2009 | 02/2008-<br>09/2008          | 01/2008-<br>03/2008 | 11/2008-<br>12/2008 | 10/ <b>2010</b> -<br>1/2011  | 09/2012-<br>12/2012         | 09/2011-<br>10/2011 |
| 4    | 10/ <b>2005</b> -<br>01/2006    | 10/ <b>2005</b> -<br>01/2006                                                               | 10/ <b>2005</b> -<br>01/2006  | 10/ <b>2005</b> -<br>01/2006  | 05/2010-<br>06/2010 | 07/2009-<br>11/2009          | 04/2009-<br>07/2009 | 01/2010-<br>02/2010 | 09/2012-<br>12/2012          |                             |                     |
| 5    | 10/ <b>2006</b> -<br>02/2007    | 10/ <b>2006</b> -<br>02/2007                                                               | 10/ <b>2006</b> -<br>-02/2007 | 10/ <b>2006</b> -<br>-02/2007 | 05/2010-<br>06/2011 | 05/ <b>2011</b> -<br>04/2012 | 02/2011-<br>04/2011 | 04/2011-<br>05/2011 |                              |                             |                     |
| 6    | 09/ <b>2007</b> -<br>02/2008    | 09/ <b>2007</b> -<br>02/2008                                                               | 09/ <b>2007</b> -<br>02/2008  | 09/ <b>2007</b> -<br>02/2008  | 05/2010-<br>06/2012 | 05/2013-<br>01/2014          | 10/2012-<br>12/2012 | 10/2012-<br>12/2012 |                              |                             |                     |
| 7    | 10/ <b>2008</b> -<br>07/2009    | 10/2008-<br>07/ <b>2009</b>                                                                | 10/ <b>2008</b> -<br>07/2009  | 10/ <b>2008</b> -<br>07/2009  | 05/2010-<br>06/2013 |                              |                     |                     |                              |                             |                     |
| 8    | 07/ <b>2010</b> -<br>31/05/2011 | English:<br>07/ <b>2010</b> -<br>04/20/2011;<br>French:<br>07/ <b>2010</b> -<br>06/11/2011 | 07/ <b>2010</b> -<br>06/2011  | 07/2010-<br>12/2010           |                     |                              |                     |                     |                              |                             |                     |

**Table: Duration of surveys, Countries, Date/Month/Year or Month/Year. (Continued)**

| Wave | China                    | Mauritius       | Korea           | Brazil                   | Bangladesh      | India                   |
|------|--------------------------|-----------------|-----------------|--------------------------|-----------------|-------------------------|
| 1    | 04/2006-08/2006          | 04/2009-05/2009 | 12/2005         | 04/2009-06/2009          | 02/2009-05/2009 | 08/2010-10/ <b>2011</b> |
| 2    | 10/ <b>2007</b> -01/2008 | 08/2010-11/2010 | 10/2008-12/2008 | 10/ <b>2012</b> -02/2013 | 03/2010-06/2010 |                         |
| 3    | 05/2009-10/2009          | 06/2011-07/2011 | 10/2010-12/2010 |                          |                 |                         |

## 2, Tax Structure Information

### 1), China and Malaysia (Mixed structures) previous to 2008

For the years previous to 2008, we obtained the information using Euromonitor country reports and WHO periodic reports on the global tobacco epidemic. Additional information about tax reform in Malaysia for earlier years is from *ITC Malaysia National Report. Findings from Wave 1 to 4 surveys (2005-5009)*. [23] The ad valorem taxes of China and Malaysia in earlier years were imputed using linear interpolation and the share of components in excise taxes were thereafter imputed.

### 2), Thailand and India

The reported tax structures of Thailand and India vary by sources. Although the WHO TFI table 9.1.0 suggests that a small amount of specific taxes exist in Thailand and a small amount of ad valorem taxes exist in India, Euromonitor and TMA reports suggest otherwise. Furthermore, a specific report about Thailand by WHO: “Tax policies on tobacco products in Thailand: The way forward” and the Thailand Euromonitor report indicate that while mixed tariff rates of specific and ad valorem taxes are applied to imported cigarettes, there is no specific excise tax imposed on domestic cigarettes. Similar conclusion is also shown in a periodic WHO report: <http://www.who.int/tobacco/economics/thailand.pdf>. Therefore, we categorize Thailand as a country with an ad valorem tax structure.

The tax structure in India is also reported to be specific only in the WHO periodic report, TMA and Euromonitor reports. Therefore, we categorize it as a country with a specific tax structure instead of a mixed structure.

### 3), EU countries

The tax structure, specific excise component, ad valorem excise component as of August of each year are obtained from EU excise duty tables, part 3, manufactured tobacco. The duty tables are published and available each year since 2001.
